# Supplementary material for: Anatomical Location of the Vesical Branches of the Inferior Hypogastric Plexus in Human Cadavers
Source: MDPI journal article supplement (doi:10.3390/diagnostics14080794), 2024-04-10
Supplement: s1 [file s1]

Table S1. Cadaver Demographics

| Cadaver # | Age     | Gender | Relevant observations                                                                                                                                                                                            |
|-----------|---------|--------|------------------------------------------------------------------------------------------------------------------------------------------------------------------------------------------------------------------|
| 1         | > 90    | M      | Formalin-phenol fixed; Intact (not hemi-sected); Healthy appearing bladder; Ureters of normal size (bilaterally); Examined right side only; Evidence of prior pelvic surgery (e.g., surgical staples)            |
| 2         | > 90    | F      | Formalin-phenol fixed; Intact (not hemisected); Healthy appearing bladder; Ureters of normal size (bilaterally); Focused on right side (tissue was quite hardened from the fixation)                             |
| 3         | 78      | M      | Formalin-phenol fixed; Intact (not hemisected); Healthy appearing bladder; Ureters of normal size (bilaterally)                                                                                                  |
| 4         | > 90    | F      | Formalin-phenol fixed; Intact (not hemisected); Healthy appearing bladder; very thin wall at ureteral orifice                                                                                                    |
| 5         | 80      | F      | Formalin-phenol fixed; Hemisected pelvis; Healthy appearing bladder; Ureters of normal size (bilaterally)                                                                                                        |
| 6         | 80      | M      | Formalin-phenol fixed; Hemisected pelvis; Healthy appearing bladder; Left ureter of normal size; No data from right hemipelvis (dissected too aggressively).                                                     |
| 7         | 56      | F      | Formalin-phenol fixed; Hemisected pelvis; Large, healthy bladder; Ureters of normal size (bilaterally), although surrounded by an abundance of fibrotic tissue (presumed endometriosis).                         |
| 8         | Unknown | F      | Formalin-phenol fixed; Hemisected pelvis; Healthy appearing bladder, although thick muscular wall visible; Uterus shifted to left due to golf ball-sized, encapsulated uterine fibroid                           |
| 9         | 66      | M      | Formalin-phenol fixed; Hemisected pelvis; Healthy appearing bladder; Ureters of normal size (bilaterally); Slightly enlarged prostate                                                                            |
| 10        | Unknown | M      | Formalin-phenol fixed; Hemisected pelvis; Healthy appearing bladder; Ureters of normal size (bilaterally); No data from left hemipelvis (dissected too aggressively).                                            |
| 11        | > 90    | F      | Formalin-phenol fixed; Hemisected pelvis; Healthy appearing bladder; Ureters of normal size (bilaterally); Prior hysterectomy; diverticula in distal colon                                                       |
| 12        | 80      | M      | Formalin-phenol fixed; Hemisected pelvis; Healthy appearing bladder; Ureters of normal size (bilaterally);                                                                                                       |
| 13        | 78      | F      | Formalin-phenol fixed; Hemisected pelvis; Bladder slightly distended; both ureters enlarged, with R>L; Multiple small calculi in right ureter (like sand); Large neuroma in pelvic ganglion region on right side |
| 14        | 89      | F      | Formalin-phenol fixed; Hemisected pelvis; Prior hysterectomy and ileostomy; Healthy appearing bladder; Ureters of normal size (bilaterally); unable to assess right side due to hysterectomy scar tissue         |
| 15        | Unknown | F      | Formalin-phenol fixed; Hemisected pelvis; Small yet healthy bladder; Ureters of normal size (bilaterally);                                                                                                       |
| 16        | 84      | M      | Formalin-phenol fixed; Hemisected pelvis; Very large and flaccid bladder; Unable to assess right side due to bowel compaction issues                                                                             |
| 17        | 86      | M      | Formalin-phenol fixed; Hemisected pelvis; Ureters of normal size (bilaterally); Examined right side only due to over dissection in prior anatomy class                                                           |
| 18        | 85      | M      | Formalin-phenol fixed; Hemisected pelvis; Ureters of normal size (bilaterally); A large tumor was evident in and around bladder. Ganglion engulfed yet sacral contributions still traceable.                     |
| 19        | > 90    | F      | Formalin-phenol fixed; Hemisected pelvis; Ureters of normal size (bilaterally); Uterine fibroids; Bladder of normal size.                                                                                        |
| 20        | Unknown | F      | Unfixed; Intact (not hemisected); Healthy appearing bladder                                                                                                                                                      |
| 21        | Unknown | F      | Unfixed; Intact (not hemisected); Healthy appearing bladder                                                                                                                                                      |
| 22        | Unknown | F      | Unfixed; Intact (not hemisected); Healthy appearing bladder                                                                                                                                                      |
| 23        | 77      | F      | Unfixed; Intact (not hemisected); Healthy appearing bladder                                                                                                                                                      |
| 24        | 62      | F      | Unfixed; Intact (not hemisected); Healthy appearing bladder                                                                                                                                                      |
| 25        | 71      | M      | Unfixed; Intact (not hemisected); Healthy appearing bladder                                                                                                                                                      |
| 26        | Unknown | F      | Thiel embalmed; Intact (not hemisected); Healthy appearing bladder                                                                                                                                               |
| 27        | Unknown | F      | Thiel embalmed; Intact (not hemisected); Healthy appearing bladder                                                                                                                                               |
| 28        | Unknown | F      | Thiel embalmed; Intact (not hemisected); Healthy appearing bladder                                                                                                                                               |
| 29        | 23      | M      | Unfixed; Intact (not hemisected); Healthy appearing bladder                                                                                                                                                      |
| 30        | > 90    | F      | Unfixed; Intact (not hemisected); Enlarged bladder                                                                                                                                                               |

Abbreviations: F = female; M = male

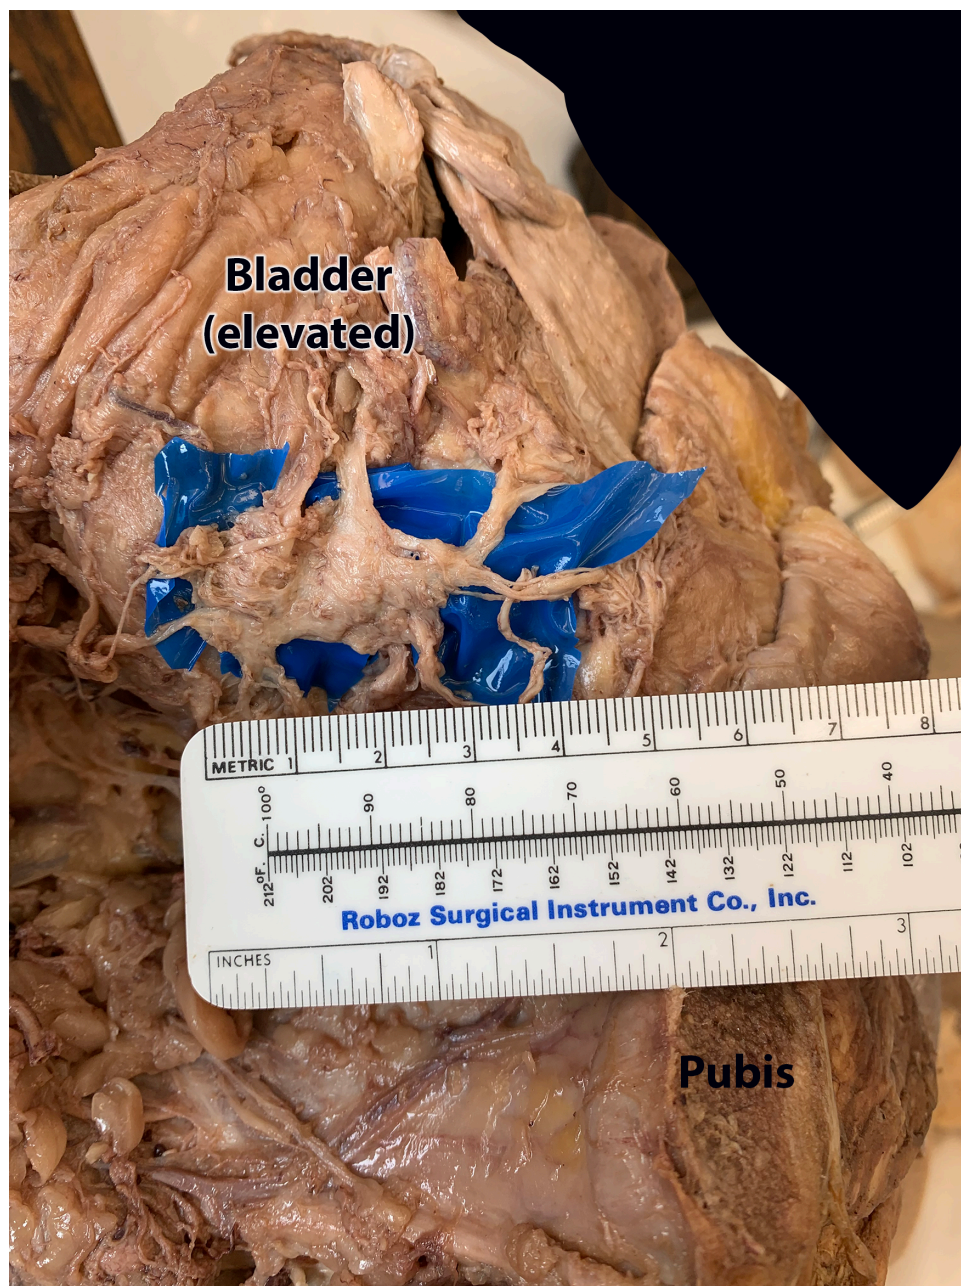

Figure S1. Neuroma engulfing pelvic ganglion and nerves on bladder wall (posterolateral to ureter).
